# Supplementary figures and images for: Intratumoral virotherapy with 4-1BBL armed modified vaccinia Ankara eradicates solid tumors and promotes protective immune memory
Source: PubMed Central journal article supplement — J Immunother Cancer. 2021 Feb 12;9(2):e001586. doi: 10.1136/jitc-2020-001586 (PMC7883866; doi:10.1136/jitc-2020-001586), 2021-02-12

## Suppl. Figure 1

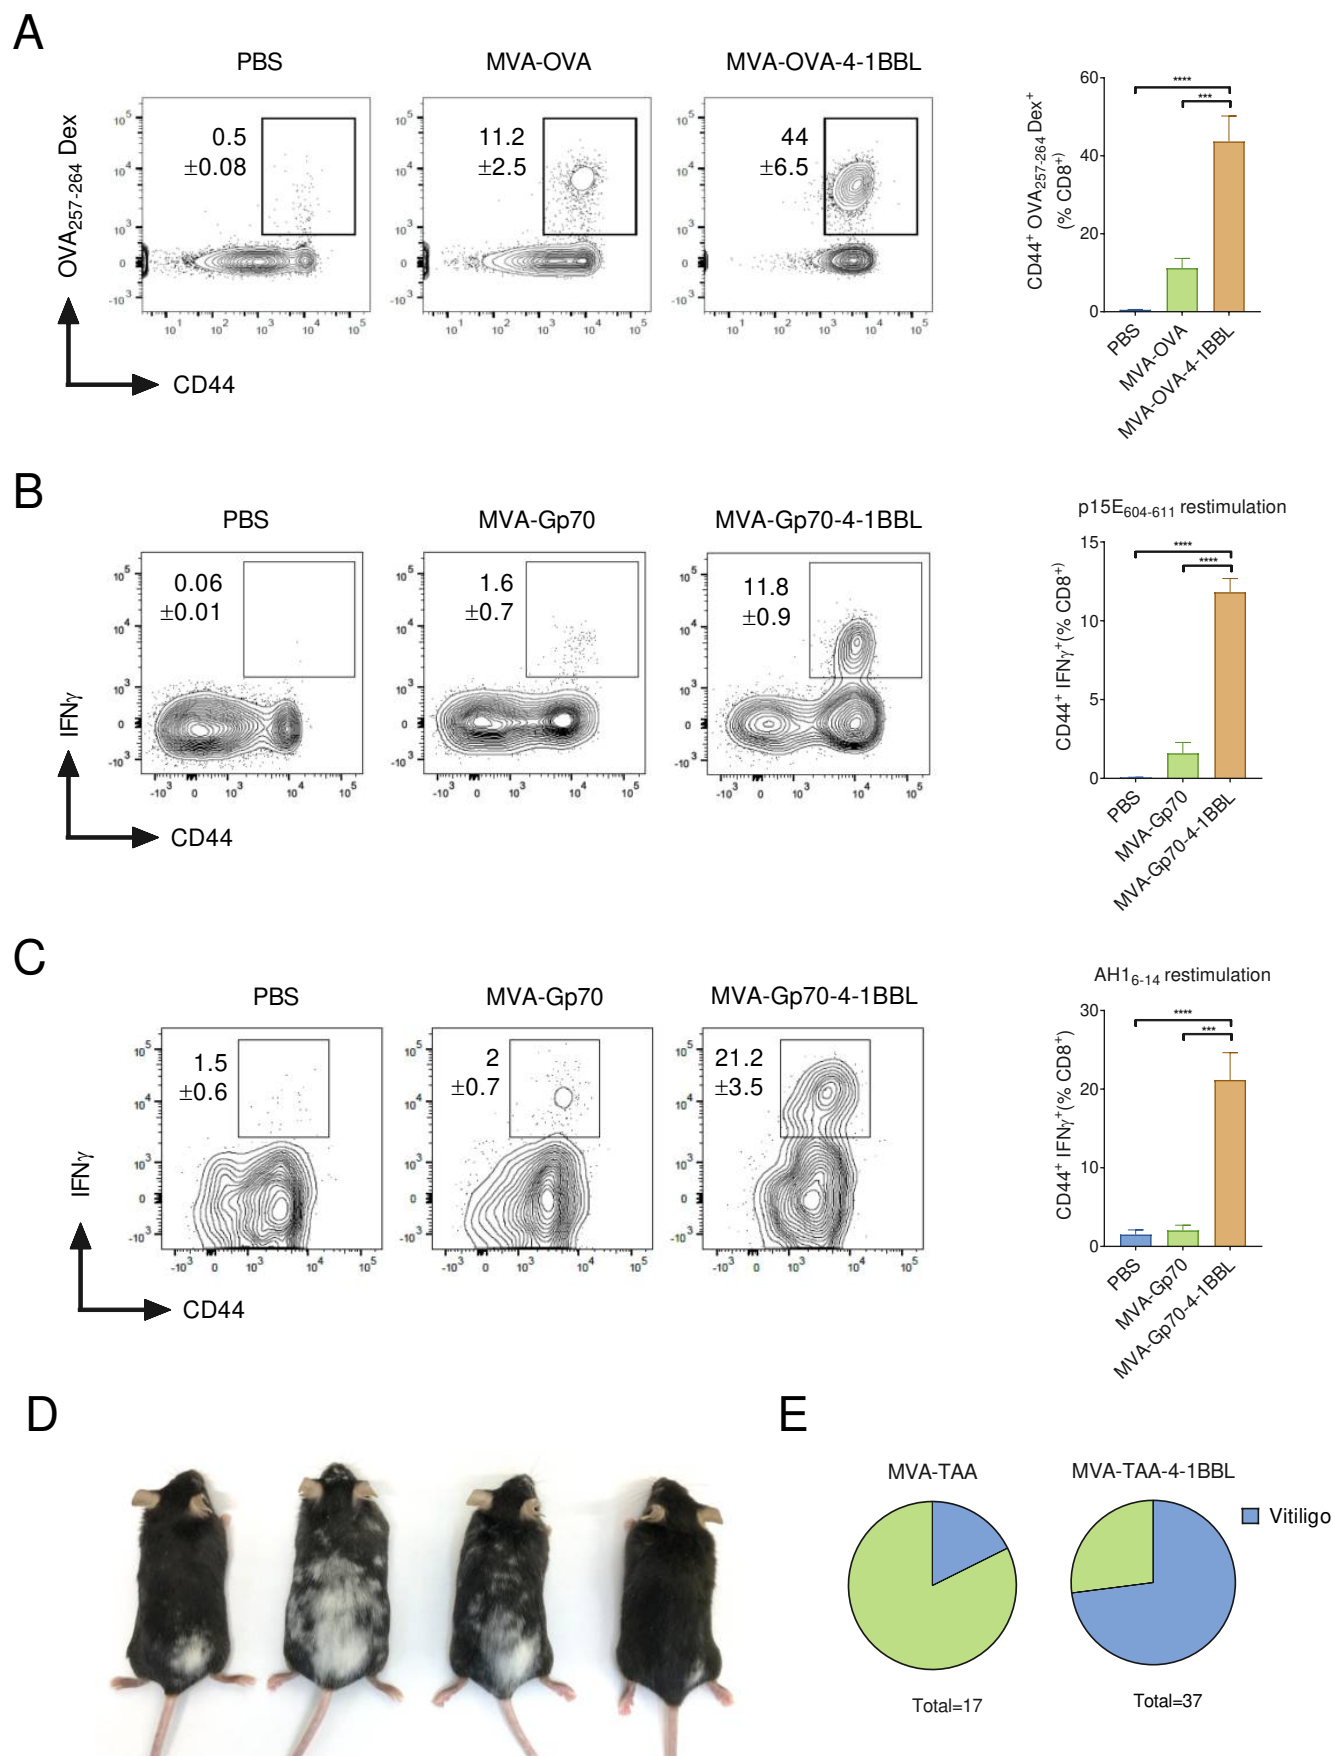

Supplement: jitc-2020-001586supp002.pdf [file jitc-2020-001586supp002.pdf]

## Suppl. Figure 2

A

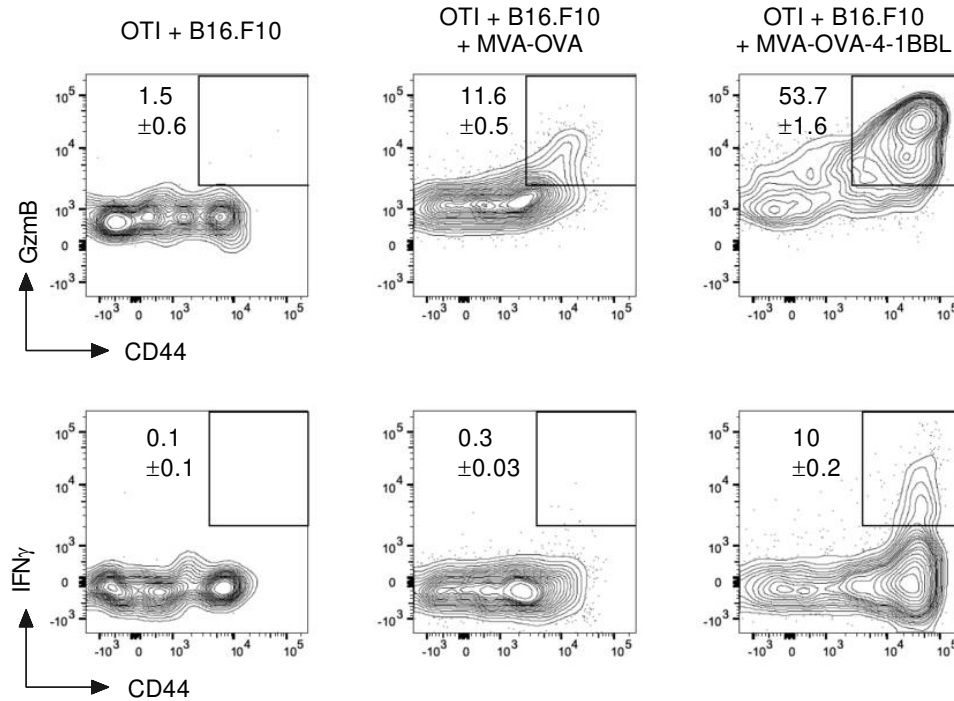

B

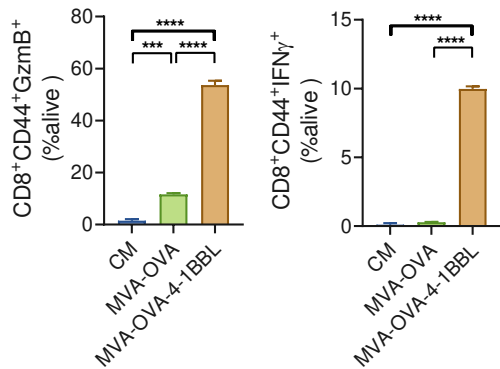

C

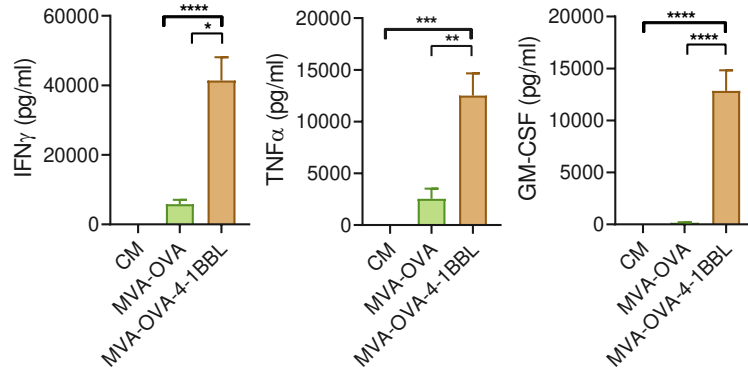

Supplement: jitc-2020-001586supp003.pdf [file jitc-2020-001586supp003.pdf]

# Suppl. Figure 3

**A**

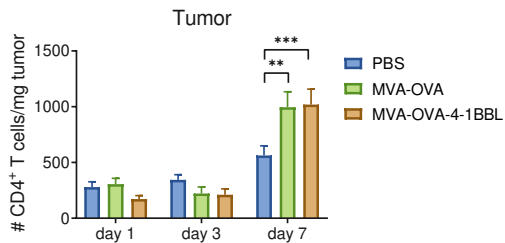

**B**

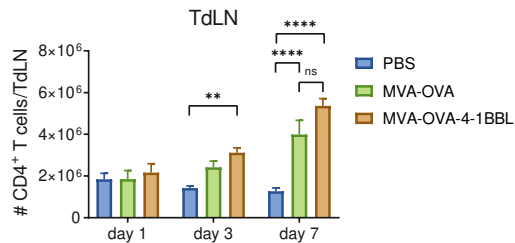

**C**

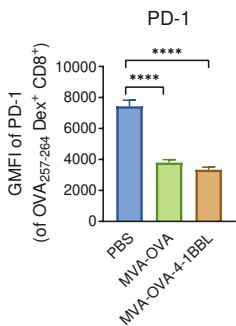

**D**

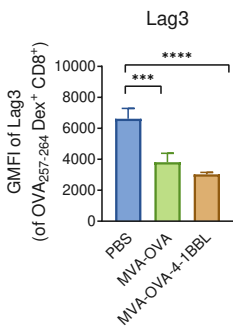

**E**

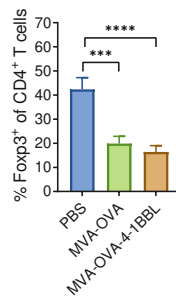

**F**

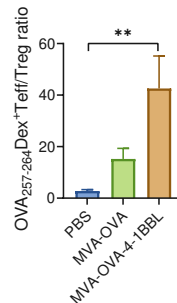

Supplement: jitc-2020-001586supp004.pdf [file jitc-2020-001586supp004.pdf]

## Suppl. Figure 4

A

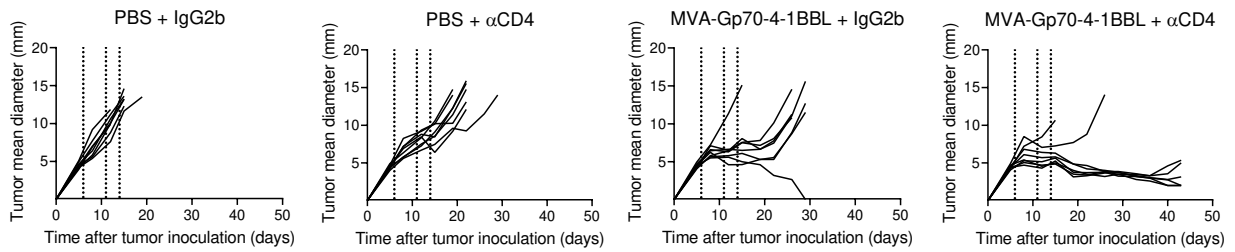

B

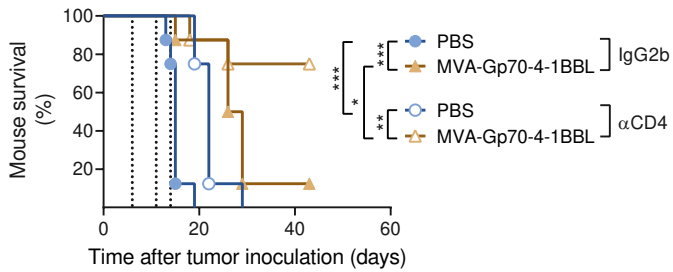

C

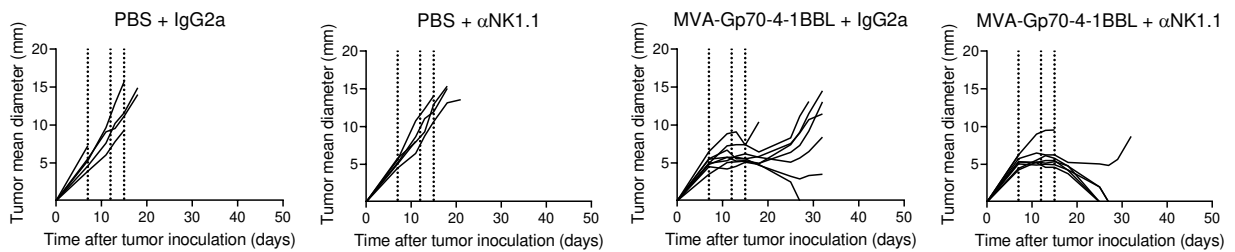

D

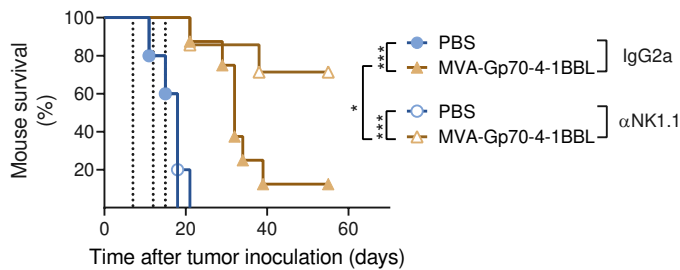

Supplement: jitc-2020-001586supp005.pdf [file jitc-2020-001586supp005.pdf]

## Suppl. Figure 5

A

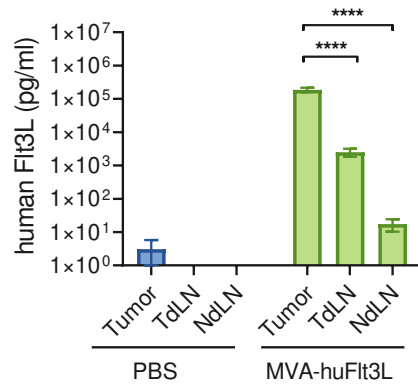

B

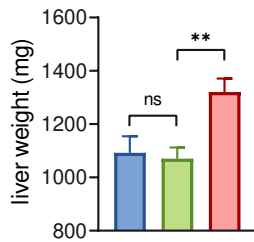

C

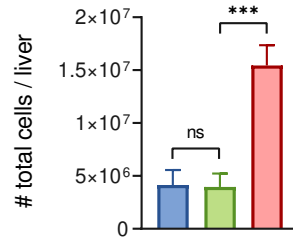

D

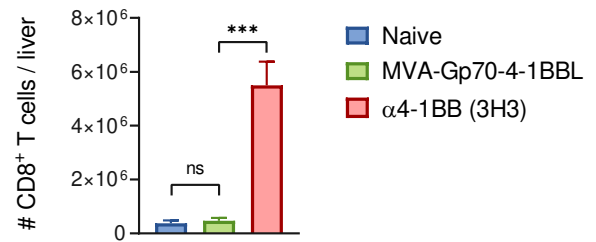

E

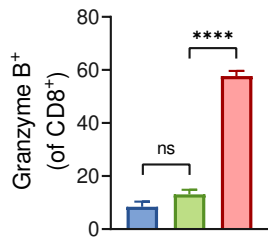

F

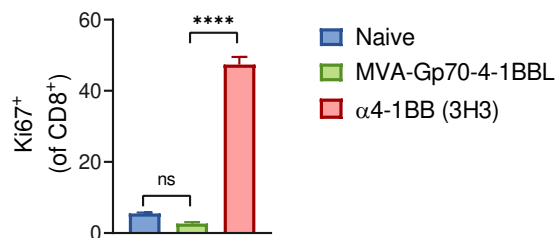

Supplement: jitc-2020-001586supp006.pdf [file jitc-2020-001586supp006.pdf]

## Suppl. Figure 6

A

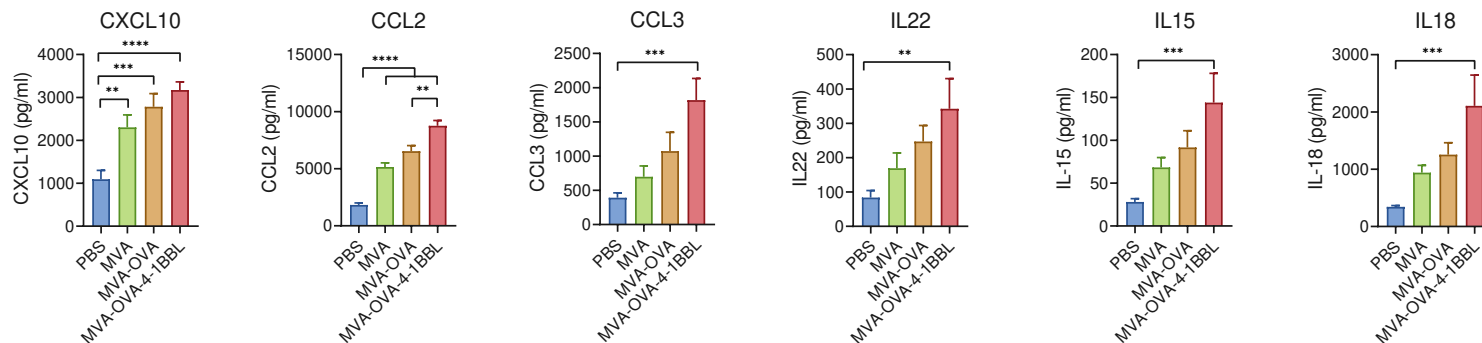

B

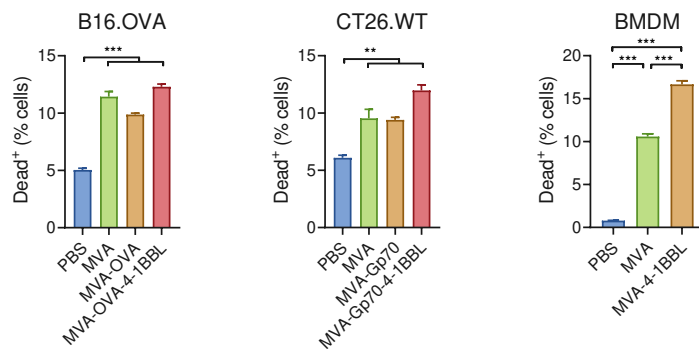

C

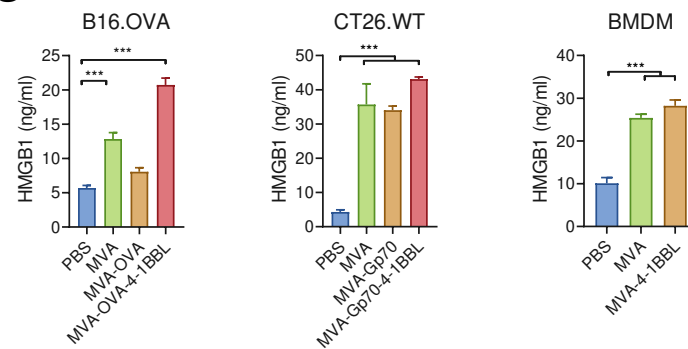

Supplement: jitc-2020-001586supp007.pdf [file jitc-2020-001586supp007.pdf]

# Suppl. Figure 7

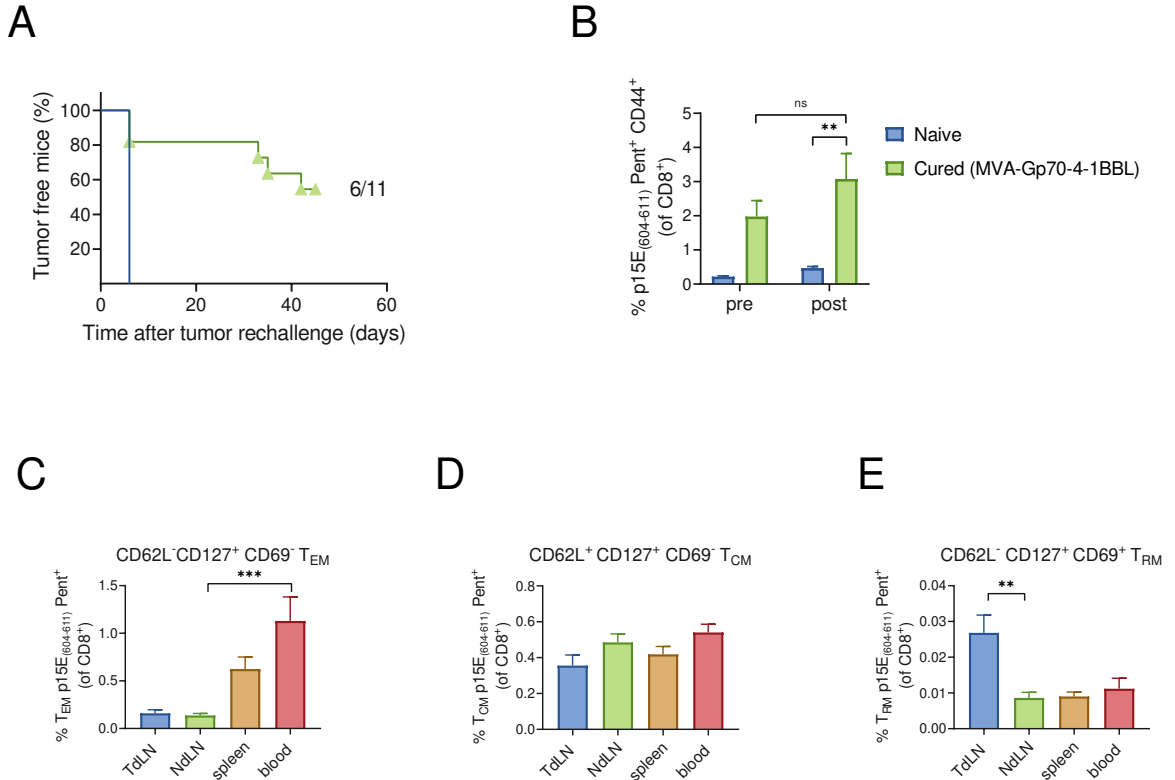

Supplement: jitc-2020-001586supp008.pdf [file jitc-2020-001586supp008.pdf]
